# Supplementary material for: Role of HIF-1α-miR30a-Snai1 Axis in Neonatal Hyperoxic Lung Injury
Source: Hindawi journal article supplement (doi:10.1155/2019/8327486), 2019-10-22

Supplemental Figure 1: *Snai1* expression *in vivo* and *in vitro*: *Snai1* mRNA (normalized to Beta-2 microglobulin) (A-C) and protein (D-F) expression (normalized to vinculin expression) in neonatal male and female mice exposed to hyperoxia (P 1-5; 95%FiO<sub>2</sub>) during the sacular stage of lung development at P7 (A,D) and P21 (B,E) and in male and female neonatal human pulmonary microvascula endothelial cells (HPMECs); (C,F). Significant differences between the indicated groups is shown by \*P<0.05.

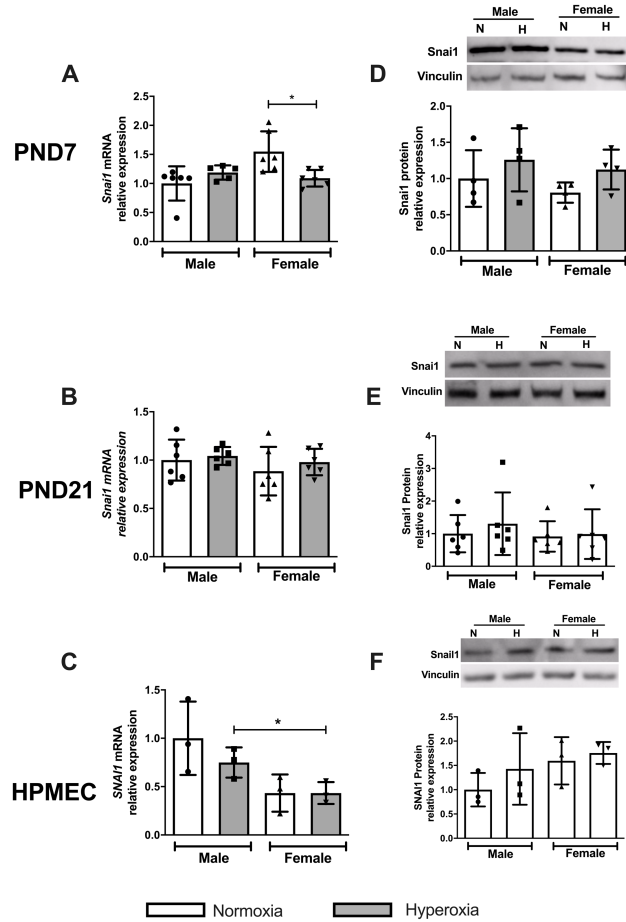

Supplement: f1 [file 8327486.f1.pdf]
